# Supplementary material for: Multifunctional metallophosphors with anti-triplet–triplet annihilation properties for solution-processable electroluminescent devices
Source: Royal Society of Chemistry journal article supplement (doi:10.1039/b718653c), 2008-01-01
Supplement: b718653c.pdf [file b718653c.pdf]

## **Supporting Information**

**for**

### **Multifunctional metallophosphors with anti triplet-triplet annihilation properties for solution-processable electroluminescent devices**

Gui-Jiang Zhou, Wai-Yeung Wong,\* Bing Yao, Zhiyuan Xie\* and Lixiang Wang

## Experimental Section

### Synthesis of organic ligands:

#### 9,9-Bis(4-diphenylaminophenyl)-2-bromofluorene

A mixture of 2-bromofluorenone<sup>9</sup> (0.20 g, 0.77 mmol) and triphenylamine (2.64 g, 10.78 mmol) in methanesulfonic acid (74 mg, 0.77 mmol) was heated at 140 °C under an inert atmosphere overnight. The cooled reaction mixture was dissolved in CH<sub>2</sub>Cl<sub>2</sub> (100 mL), washed with Na<sub>2</sub>CO<sub>3</sub> solution, dried over anhydrous MgSO<sub>4</sub> and finally concentrated. Chromatography of the mixture on silica gel, first eluting with hexane/CH<sub>2</sub>Cl<sub>2</sub> (20:1, v/v) to remove the excess triphenylamine, followed by hexane/CH<sub>2</sub>Cl<sub>2</sub> (2:1, v/v) to isolate the product as a white solid (0.39 g, 70%). <sup>1</sup>H NMR (400 MHz, CDCl<sub>3</sub>): δ (ppm) 7.62 (d, *J* = 7.6 Hz, 1H, Ar), 7.52 (d, *J* = 8.0 Hz, 1H, Ar), 7.47 (t, *J* = 1.4 Hz, 1H, Ar), 7.41–7.38 (m, 1H, Ar), 7.34–7.32 (m, 1H, Ar), 7.29–7.20 (m, 2H, Ar), 7.16–7.12 (m, 8H, Ar), 7.00–6.89 (m, 16H, Ar), 6.84–6.82 (m, 4H, Ar). FAB-MS (*m/z*): 732 [M]<sup>+</sup>. Anal. Calcd for C<sub>49</sub>H<sub>35</sub>N<sub>2</sub>Br: C, 80.43; H, 4.82; N, 3.83. Found: C, 80.12; H, 4.78; N, 3.60.

#### 9,9-Bis(4-diphenylaminophenyl)-2-pyridinylfluorene (HL1)

9,9-Bis(4-diphenylaminophenyl)-2-bromofluorene (1.83 g, 2.50 mmol) and 2-(tributylstannyl)pyridine (1.01 g, 2.75 mmol) were mixed in dry toluene (50 mL) and Pd(PPh<sub>3</sub>)<sub>4</sub> (0.29 g, 0.25 mmol) was then added to the solution. The resulting mixture was stirred at 110 °C overnight. After cooling to room temperature, the reaction mixture was poured into a separating funnel and CH<sub>2</sub>Cl<sub>2</sub> (150 mL) was added followed by washing with water (3 × 100 mL). The organic phase was dried over MgSO<sub>4</sub> and concentrated. The residue was purified by column chromatography eluting with CH<sub>2</sub>Cl<sub>2</sub>/hexane (1:1, v/v). The title product was obtained as a white solid (1.19 g, 65%). <sup>1</sup>H NMR (400 MHz, CDCl<sub>3</sub>): δ (ppm) 8.70–8.69 (m, 1H, Ar), 8.07 (s, 1H, Ar), 8.05 (d, *J* = 8.0 Hz, 1H, Ar), 7.86 (d, *J* = 7.6 Hz, 1H,

Ar), 7.80 (d,  $J = 7.6$  Hz, 1H, Ar), 7.74–7.71 (m, 2H, Ar), 7.46 (d,  $J = 7.6$  Hz, 1H, Ar), 7.40 (t,  $J = 7.4$  Hz, 1H, Ar), 7.32 (t,  $J = 7.4$  Hz, 1H, Ar), 7.24–7.20 (m, 9H, Ar), 7.14 (d,  $J = 8.4$  Hz, 4H, Ar), 7.09–7.07 (m, 8H, Ar), 7.01–6.93 (m, 8H, Ar).  $^{13}\text{C}$  NMR (100 MHz,  $\text{CDCl}_3$ ):  $\delta$  (ppm) 157.48, 152.16, 152.09, 149.57, 147.59, 146.14, 140.95, 139.41, 138.80, 136.67, 129.11, 128.89, 127.87, 127.42, 126.54, 126.26, 124.61, 124.33, 123.06, 122.68, 121.95, 120.71, 120.39 (Ar), 64.59 (quat. C). FAB-MS ( $m/z$ ): 729  $[\text{M}]^+$ . Anal. Calcd for  $\text{C}_{54}\text{H}_{39}\text{N}_3$ : C, 88.86; H, 5.39; N, 5.76. Found: C, 88.76; H, 5.21; N, 5.58.

### **9,9-Bis(4-diphenylaminophenyl)-2-isoquinolinylfluorene (HL2)**

Under a  $\text{N}_2$  atmosphere, 9-bis(4-diphenylaminophenyl)-2-bromofluorene (1.20 g, 1.64 mmol) in dry THF (30 mL) was cooled to  $-78$  °C and then  $n\text{BuLi}$  (1.6 M in hexane) (1.2 mL) was added. The reaction mixture was stirred at the same temperature for 30 min and trimethylborate (0.21 g, 0.23 mL) was introduced to the reaction mixture with a syringe. Then the reaction mixture was warmed to room temperature slowly and dilute HCl (30 mL) was added. The mixture was stirred vigorously for 10 min and poured into a separating funnel. It was extracted with  $\text{CH}_2\text{Cl}_2$  ( $3 \times 60$  mL). The combined organic phase was washed with water ( $3 \times 100$  mL) and dried over  $\text{MgSO}_4$ . After concentration, the residue was purified by column chromatography on silica gel eluting first with  $\text{CH}_2\text{Cl}_2$  to remove the impurity and then diethyl ether to elute the product. The organic boronic acid derivative was obtained as a white solid (0.80 g, 70%). Then 1-chloroisoquinoline (0.10 g, 0.61 mmol) and the as-prepared organic boronic acid (0.50 g, 0.72 mmol) were combined in a mixture of toluene (20 mL), THF (10 mL) and 2 M  $\text{Na}_2\text{CO}_3$  (20 mL) under an inert atmosphere. The catalyst  $\text{Pd}(\text{PPh}_3)_4$  (0.07 g, 0.06 mmol) was then added to the solution. The resulting reaction mixture was stirred at 110 °C for 24 h. Then water (100 mL) was added to the cooled reaction mixture which was extracted with  $\text{CH}_2\text{Cl}_2$  ( $3 \times 60$  mL). The organic solution was washed with water ( $3 \times 100$  mL) and dried over  $\text{MgSO}_4$ . The solvent was

removed under reduced pressure and the residue was purified on a silica gel column with CH<sub>2</sub>Cl<sub>2</sub>/hexane (3:1, v/v) to give the title product as a pale yellow solid (0.40 g, 84%). <sup>1</sup>H NMR (400 MHz, CDCl<sub>3</sub>): δ (ppm) 8.62 (d, *J* = 6.0 Hz, 1H, Ar), 7.99–7.96 (m, 2H, Ar), 7.90–7.86 (m, 2H, Ar), 7.83–7.80 (m, 2H, Ar), 7.70–7.65 (m, 2H, Ar), 7.50 (d, *J* = 7.6 Hz, 1H, Ar), 7.46–7.41 (m, 2H, Ar), 7.38–7.34 (m, 1H, Ar), 7.25–7.20 (m, 8H, Ar), 7.19–7.15 (m, 4H, Ar), 7.09–7.06 (m, 8H, Ar), 7.01–6.94 (m, 8H, Ar). <sup>13</sup>C NMR (100 MHz, CDCl<sub>3</sub>): δ (ppm) 160.58, 151.81, 151.33, 147.61, 146.20, 142.12, 140.45, 139.57, 139.53, 138.54, 136.90, 129.91, 129.39, 129.11, 128.89, 128.08, 127.92, 127.53, 127.47, 127.06, 127.00, 126.66, 126.30, 124.17, 123.32, 122.63, 120.50, 120.44, 119.86 (Ar), 64.58 (quat. C). FAB-MS (*m/z*): 779 [M]<sup>+</sup>. Anal. Calcd for C<sub>58</sub>H<sub>41</sub>N<sub>3</sub>: C, 89.31; H, 5.30; N, 5.39. Found: C, 89.18; H, 5.33; N, 5.45.

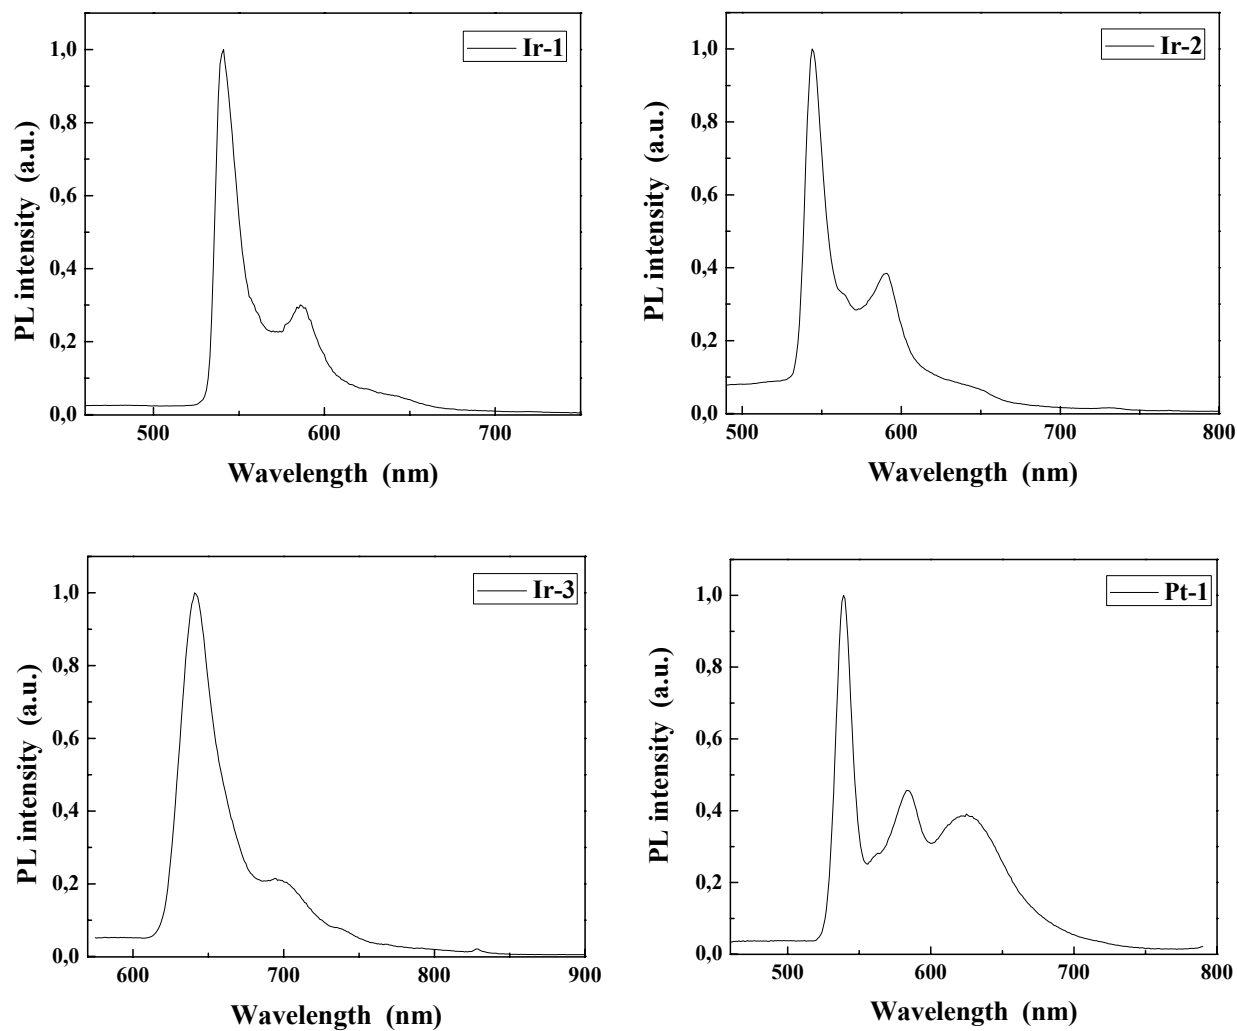

Fig. S1 PL spectra for the triplet emitters in CH<sub>2</sub>Cl<sub>2</sub> glass at 77 K.

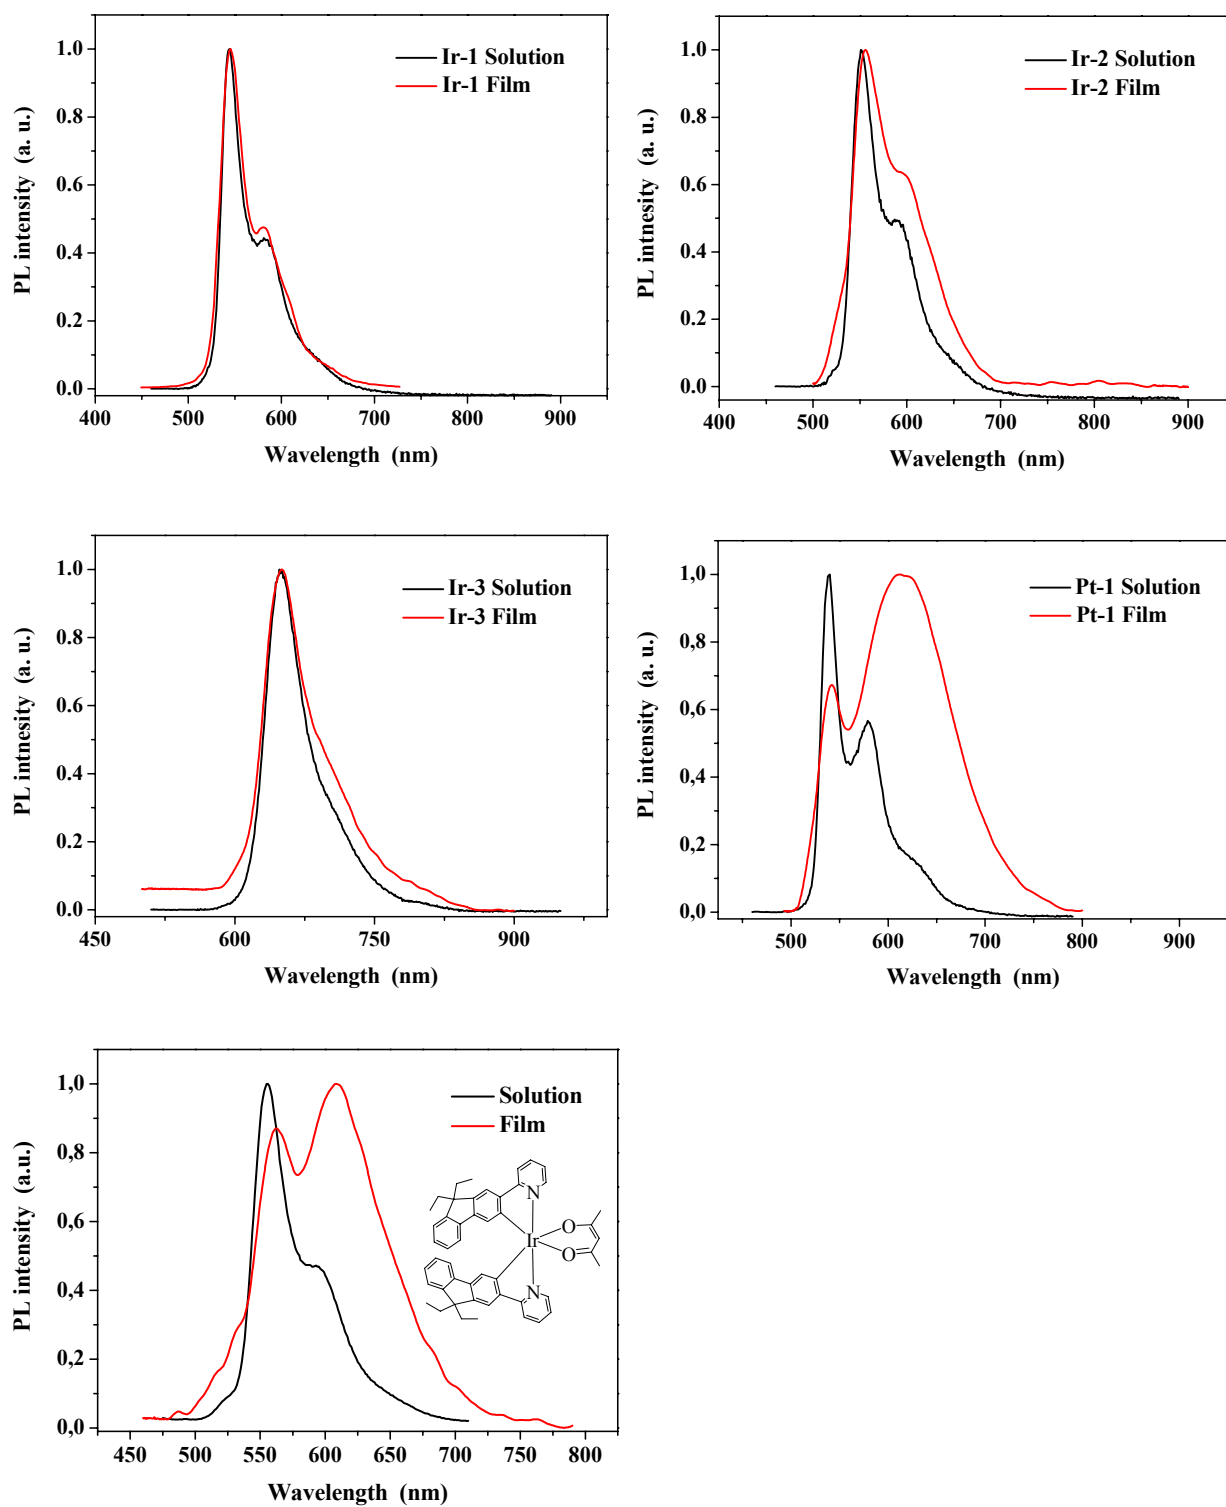

Fig. S2 PL spectra for the triplet emitters in  $\text{CH}_2\text{Cl}_2$  solution and neat film at 293 K.

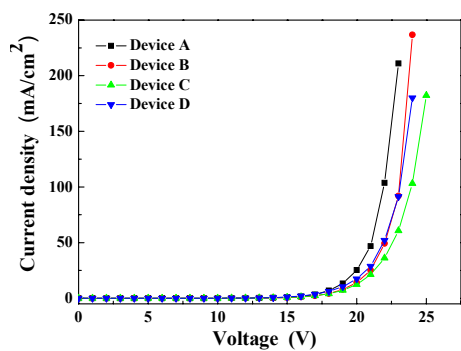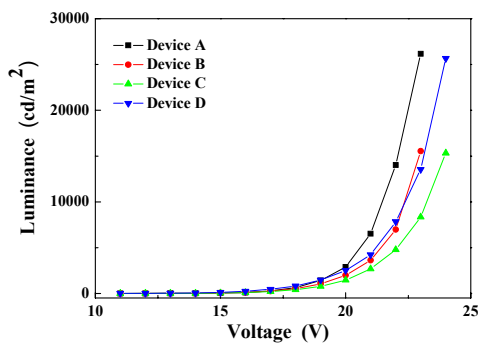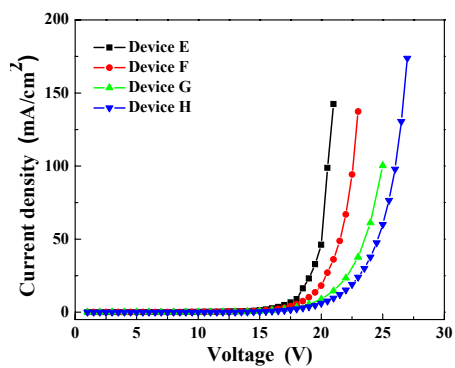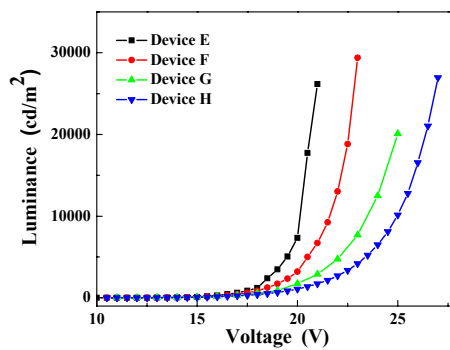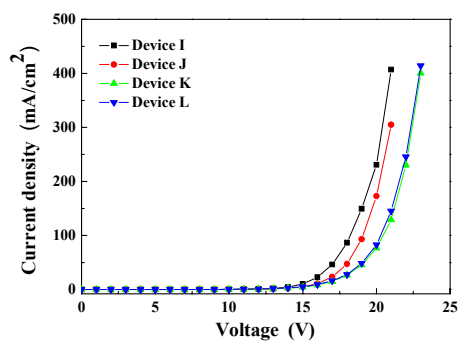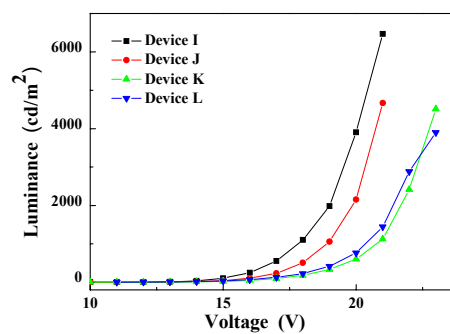

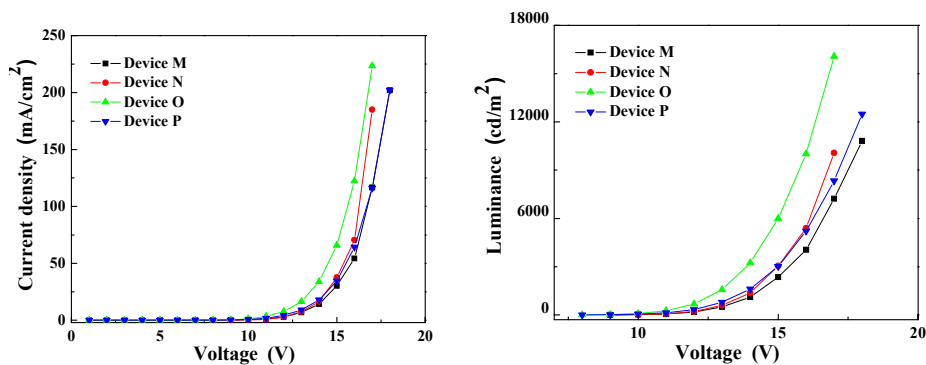

**Fig. S3** The current density–voltage–luminance ( $J$ – $V$ – $L$ ) characteristics of all of the OLED devices with different doping levels.

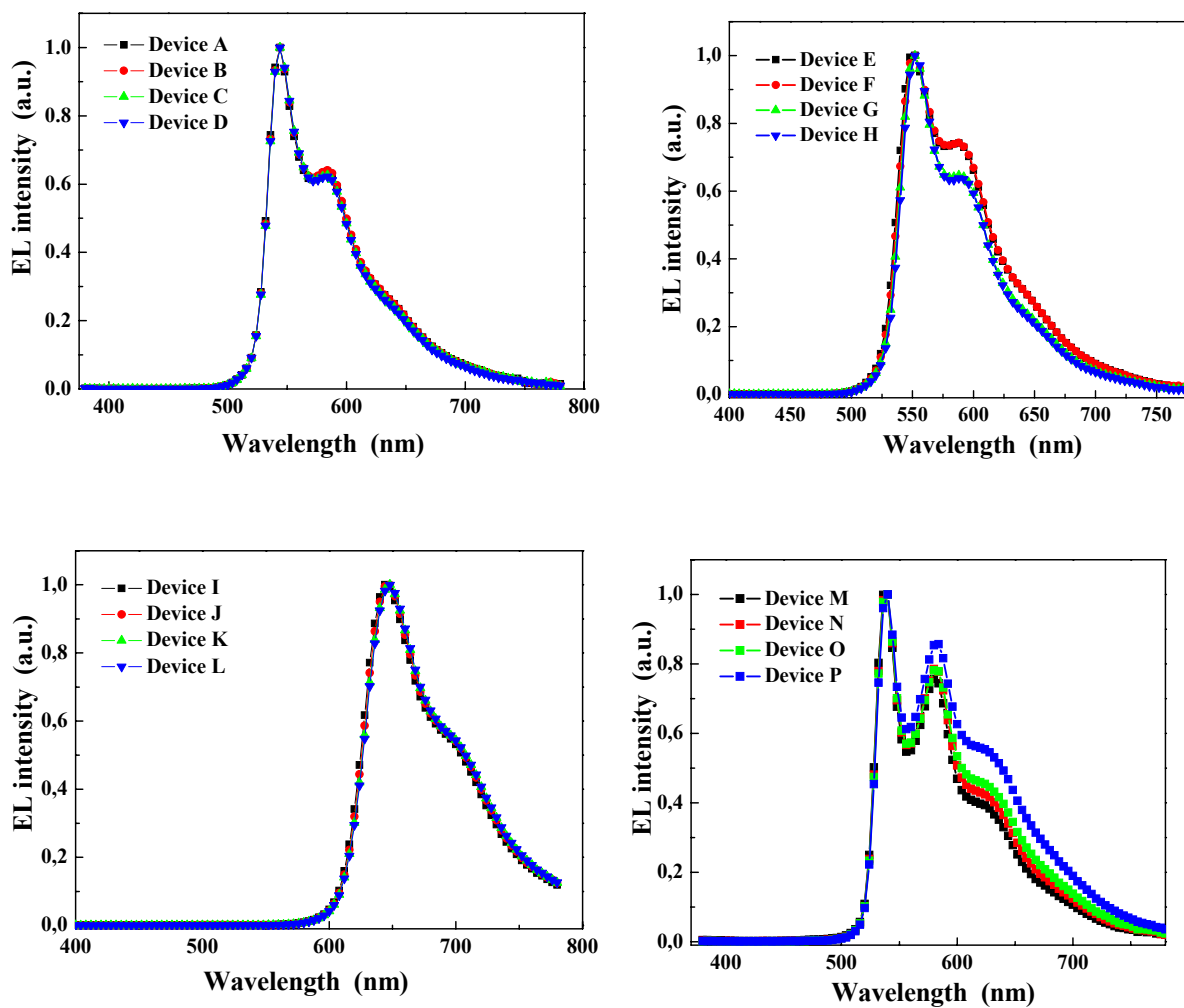

**Fig. S4** EL spectra for all of the OLED devices with different doping levels.



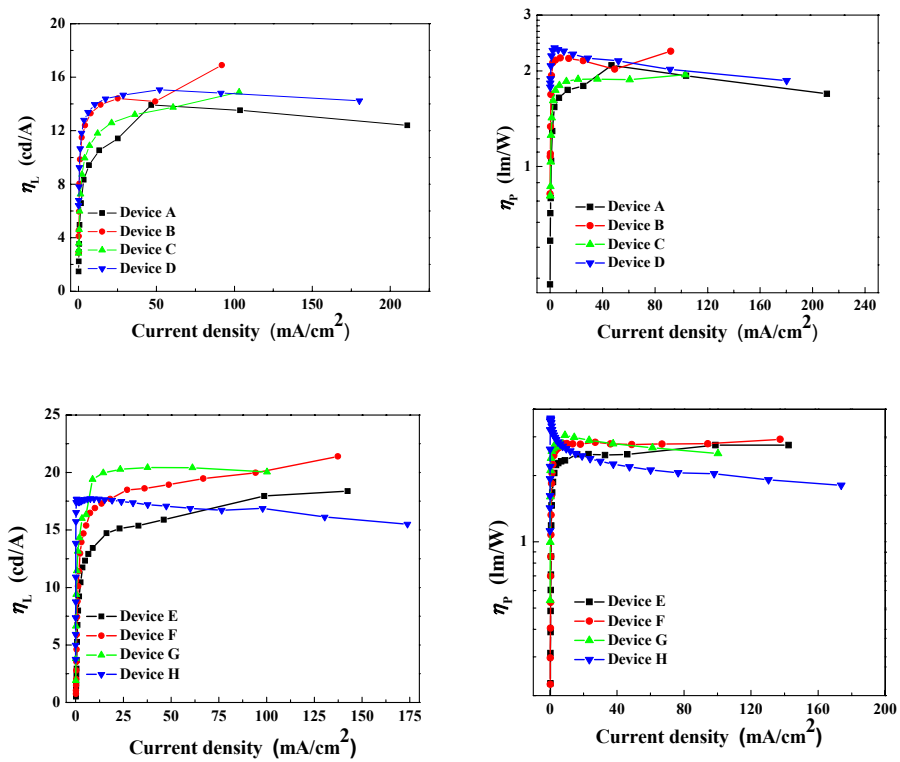

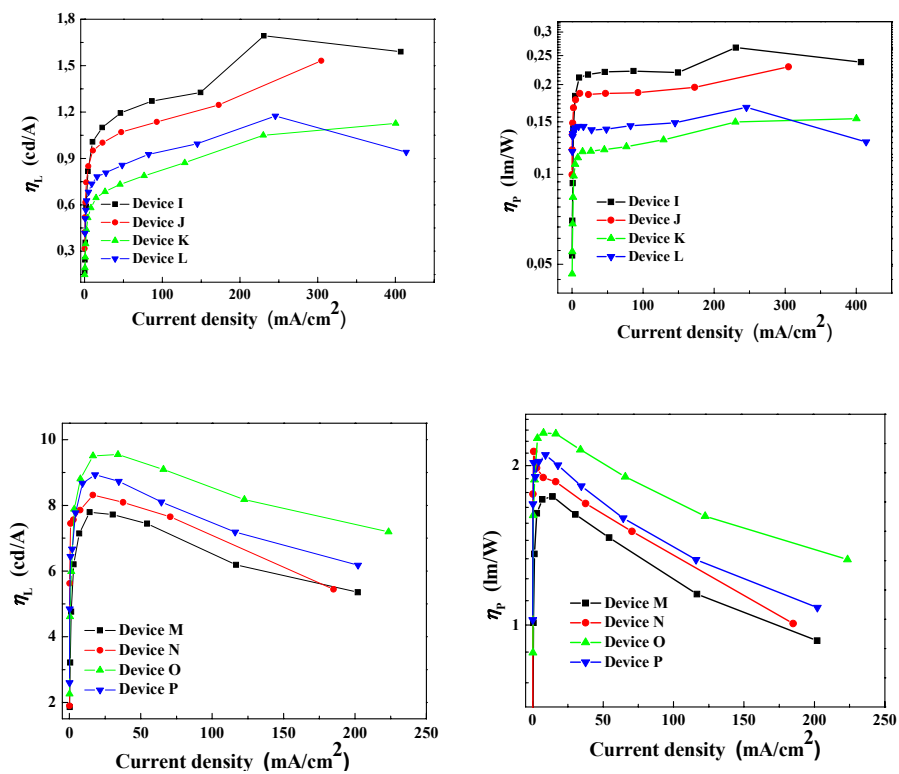

**Fig. S5** Luminance and power efficiencies as a function of current density for all of the OLED devices with different doping levels.

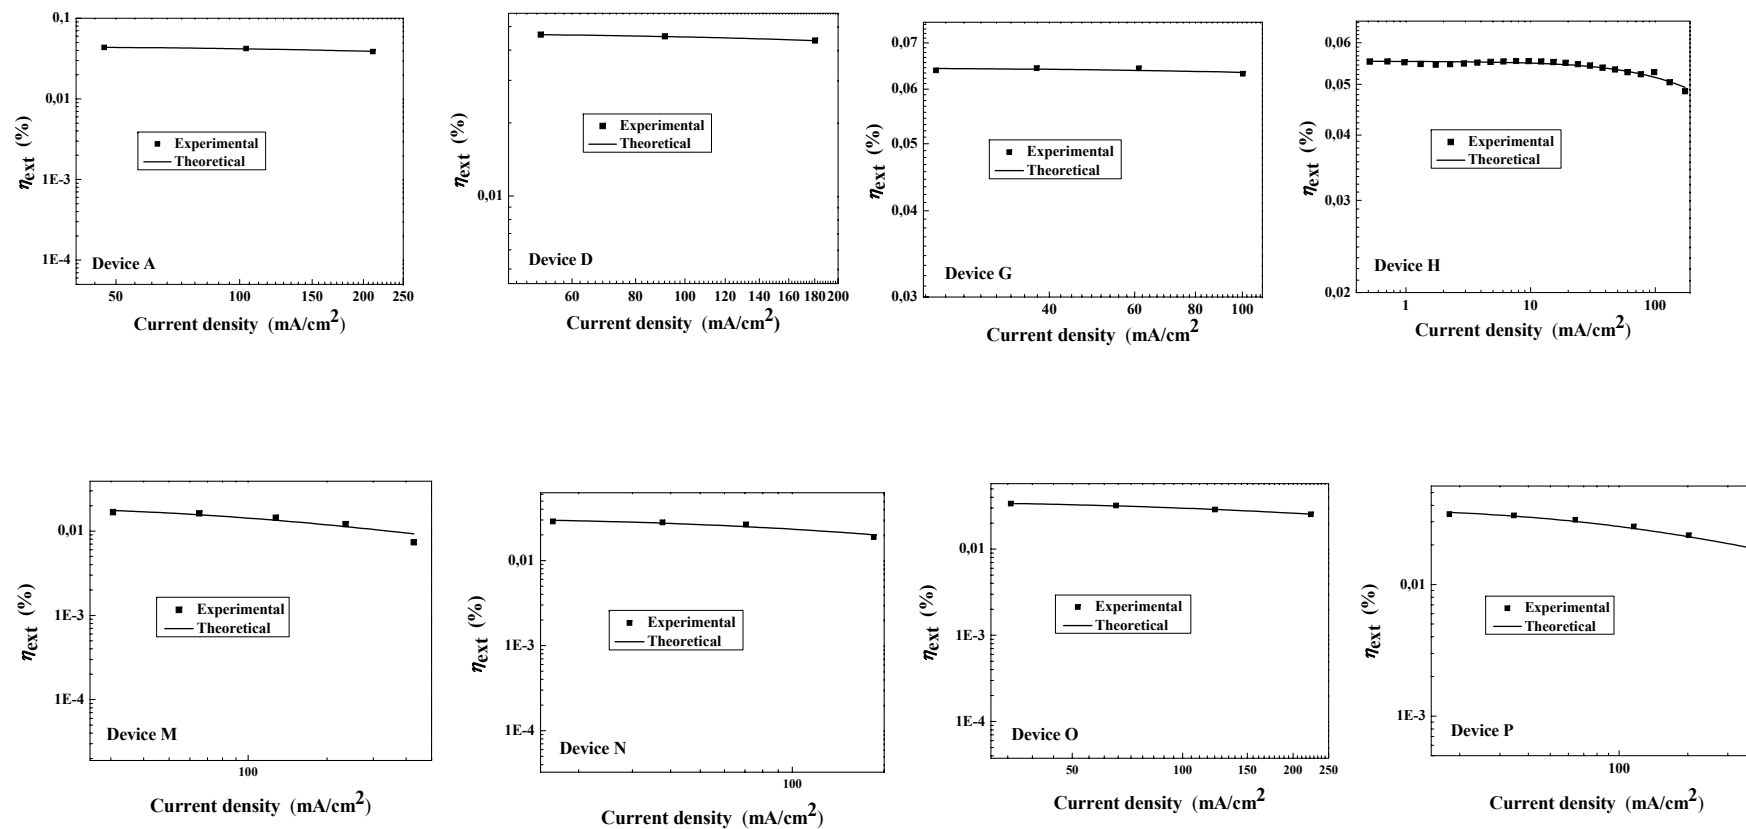

**Fig. S6** Experimental  $\eta_{\text{ext}}$  versus current density data fitted by a theoretical equation involving T-T annihilation.

**Table S1** Performance of the electrophosphorescent OLEDs **A–P**.

| Device   | Phosphor dopant        | $V_{\text{turn-on}}$<br>/V | Luminance $L$<br>/cd m <sup>-2</sup> | $\eta_{\text{ext}}$<br>/% | $\eta_{\text{L}}$<br>/cd A <sup>-1</sup> | $\eta_{\text{p}}$<br>/lm W <sup>-1</sup> | $\lambda_{\text{max}}$<br>/nm <sup>d</sup> |
|----------|------------------------|----------------------------|--------------------------------------|---------------------------|------------------------------------------|------------------------------------------|--------------------------------------------|
| <b>A</b> | <b>Ir-1</b> (3 wt.-%)  | 11.0                       | 26160 (23) <sup>a</sup>              | 4.34 (21)                 | 13.93 (21)                               | 2.08 (21)                                | 544                                        |
|          |                        |                            | 2237 <sup>b</sup>                    | 3.44                      | 11.02                                    | 1.77                                     | (0.45, 0.54)                               |
|          |                        |                            | 13499 <sup>c</sup>                   | 4.22                      | 13.55                                    | 2.31                                     |                                            |
| <b>B</b> | <b>Ir-1</b> (6 wt.-%)  | 11.0                       | 15540 (23)                           | 5.26 (23)                 | 16.90 (23)                               | 2.31 (23)                                | 544                                        |
|          |                        |                            | 2835                                 | 4.42                      | 14.19                                    | 2.17                                     | (0.45, 0.54)                               |
|          |                        |                            | 15540                                | 5.26                      | 16.90                                    | 1.93                                     |                                            |
| <b>C</b> | <b>Ir-1</b> (9 wt.-%)  | 11.0                       | 15330 (24)                           | 4.60 (24)                 | 14.88 (24)                               | 1.95 (24)                                | 544                                        |
|          |                        |                            | 2511                                 | 3.86                      | 12.47                                    | 1.88                                     | (0.45, 0.54)                               |
|          |                        |                            | 14864                                | 4.57                      | 14.79                                    | 1.94                                     |                                            |
| <b>D</b> | <b>Ir-1</b> (12 wt.-%) | 11.0                       | 25660 (24)                           | 4.63 (22)                 | 15.07 (22)                               | 2.36 (17)                                | 544                                        |
|          |                        |                            | 2913                                 | 4.44                      | 14.45                                    | 2.25                                     | (0.45, 0.54)                               |
|          |                        |                            | 14712                                | 4.54                      | 14.76                                    | 2.01                                     |                                            |
| <b>E</b> | <b>Ir-2</b> (3 wt.-%)  | 10.0                       | 26180 (21)                           | 6.02 (21)                 | 18.38 (21)                               | 2.75 (21)                                | 552                                        |
|          |                        |                            | 2991                                 | 4.90                      | 14.94                                    | 2.50                                     | (0.48, 0.52)                               |
|          |                        |                            | 18074                                | 5.89                      | 17.96                                    | 2.75                                     |                                            |
| <b>F</b> | <b>Ir-2</b> (6 wt.-%)  | 10.5                       | 29380 (23)                           | 7.04 (23)                 | 21.40 (23)                               | 2.92 (23)                                | 552                                        |
|          |                        |                            | 3624                                 | 5.88                      | 17.86                                    | 2.79                                     | (0.48, 0.52)                               |
|          |                        |                            | 20317                                | 6.64                      | 20.16                                    | 2.81                                     |                                            |
| <b>G</b> | <b>Ir-2</b> (9 wt.-%)  | 10.6                       | 20100 (25)                           | 6.43 (23)                 | 20.42 (23)                               | 3.05 (23)                                | 552                                        |
|          |                        |                            | 4073                                 | 6.35                      | 20.15                                    | 2.93                                     | (0.47, 0.52)                               |
|          |                        |                            | 20023                                | 6.32                      | 20.06                                    | 2.52                                     |                                            |
| <b>H</b> | <b>Ir-2</b> (12 wt.-%) | 10.6                       | 26960 (27)                           | 5.54 (16)                 | 17.72 (16)                               | 3.64 (15)                                | 552                                        |
|          |                        |                            | 3505                                 | 5.49                      | 17.56                                    | 2.44                                     | (0.47, 0.52)                               |
|          |                        |                            | 16806                                | 5.26                      | 16.82                                    | 2.03                                     |                                            |
| <b>I</b> | <b>Ir-3</b> (3 wt.-%)  | 11.0                       | 6471 (21)                            | 4.23 (20)                 | 1.69 (20)                                | 0.27 (20)                                | 648                                        |
|          |                        |                            | 220                                  | 2.70                      | 1.08                                     | 0.21                                     | (0.70, 0.30)                               |
|          |                        |                            | 1288                                 | 3.21                      | 1.28                                     | 0.22                                     |                                            |
| <b>J</b> | <b>Ir-3</b> (6 wt.-%)  | 11.0                       | 4669 (21)                            | 4.00 (21)                 | 1.53 (21)                                | 0.23 (21)                                | 648                                        |
|          |                        |                            | 197                                  | 2.58                      | 0.99                                     | 0.19                                     | (0.70, 0.30)                               |
|          |                        |                            | 1147                                 | 2.99                      | 1.15                                     | 0.19                                     |                                            |
| <b>K</b> | <b>Ir-3</b> (9 wt.-%)  | 11.0                       | 4512 (23)                            | 3.03 (23)                 | 1.13 (23)                                | 0.15 (23)                                | 648                                        |
|          |                        |                            | 132                                  | 1.79                      | 0.66                                     | 0.12                                     | (0.70, 0.30)                               |
|          |                        |                            | 842                                  | 2.23                      | 1.83                                     | 0.13                                     |                                            |
| <b>L</b> | <b>Ir-3</b> (12 wt.-%) | 11.0                       | 3898 (23)                            | 3.20 (22)                 | 1.17 (22)                                | 0.17 (22)                                | 648                                        |
|          |                        |                            | 158                                  | 2.16                      | 0.79                                     | 0.14                                     | (0.70, 0.29)                               |
|          |                        |                            | 959                                  | 2.58                      | 0.95                                     | 0.15                                     |                                            |
| <b>M</b> | <b>Pt-1</b> (3 wt.-%)  | 8.0                        | 10810 (18)                           | 1.68 (14)                 | 7.79 (14)                                | 1.75 (14)                                | 540                                        |
|          |                        |                            | 1552                                 | 1.62                      | 7.76                                     | 1.70                                     | (0.46, 0.53)                               |
|          |                        |                            | 6354                                 | 1.52                      | 6.52                                     | 1.22                                     |                                            |
| <b>N</b> | <b>Pt-1</b> (6 wt.-%)  | 9.0                        | 10070 (18)                           | 2.88 (14)                 | 8.31 (11)                                | 2.13 (14)                                | 540                                        |
|          |                        |                            | 1652                                 | 2.87                      | 8.27                                     | 1.83                                     | (0.46, 0.53)                               |
|          |                        |                            | 6632                                 | 2.45                      | 7.08                                     | 1.35                                     |                                            |
| <b>O</b> | <b>Pt-1</b> (10 wt.-%) | 8.0                        | 16070 (17)                           | 3.36 (14)                 | 9.55 (11)                                | 2.31 (14)                                | 540                                        |
|          |                        |                            | 1907                                 | 3.35                      | 9.51                                     | 2.27                                     | (0.47, 0.52)                               |
|          |                        |                            | 8369                                 | 3.01                      | 8.54                                     | 1.72                                     |                                            |
| <b>P</b> | <b>Pt-1</b> (15 wt.-%) | 8.0                        | 12490 (18)                           | 3.42 (14)                 | 8.93 (13)                                | 2.10 (14)                                | 540                                        |
|          |                        |                            | 1776                                 | 3.41                      | 8.91                                     | 1.98                                     | (0.48, 0.51)                               |
|          |                        |                            | 7404                                 | 2.86                      | 7.47                                     | 1.42                                     |                                            |

<sup>a</sup> Maximum values of the devices. Values in parentheses are the voltages at which they were obtained. <sup>b</sup> Values collected at 20 mA cm<sup>-2</sup>. <sup>c</sup> Values collected at 100 mA cm<sup>-2</sup>. <sup>d</sup> CIE coordinates [x, y] in parentheses.
